# Supplementary material
Source: PubMed Central journal article supplement (PMC8026497)
Supplement: NIHMS1647183-supplement-1.pdf [file NIHMS1647183-supplement-1.pdf]

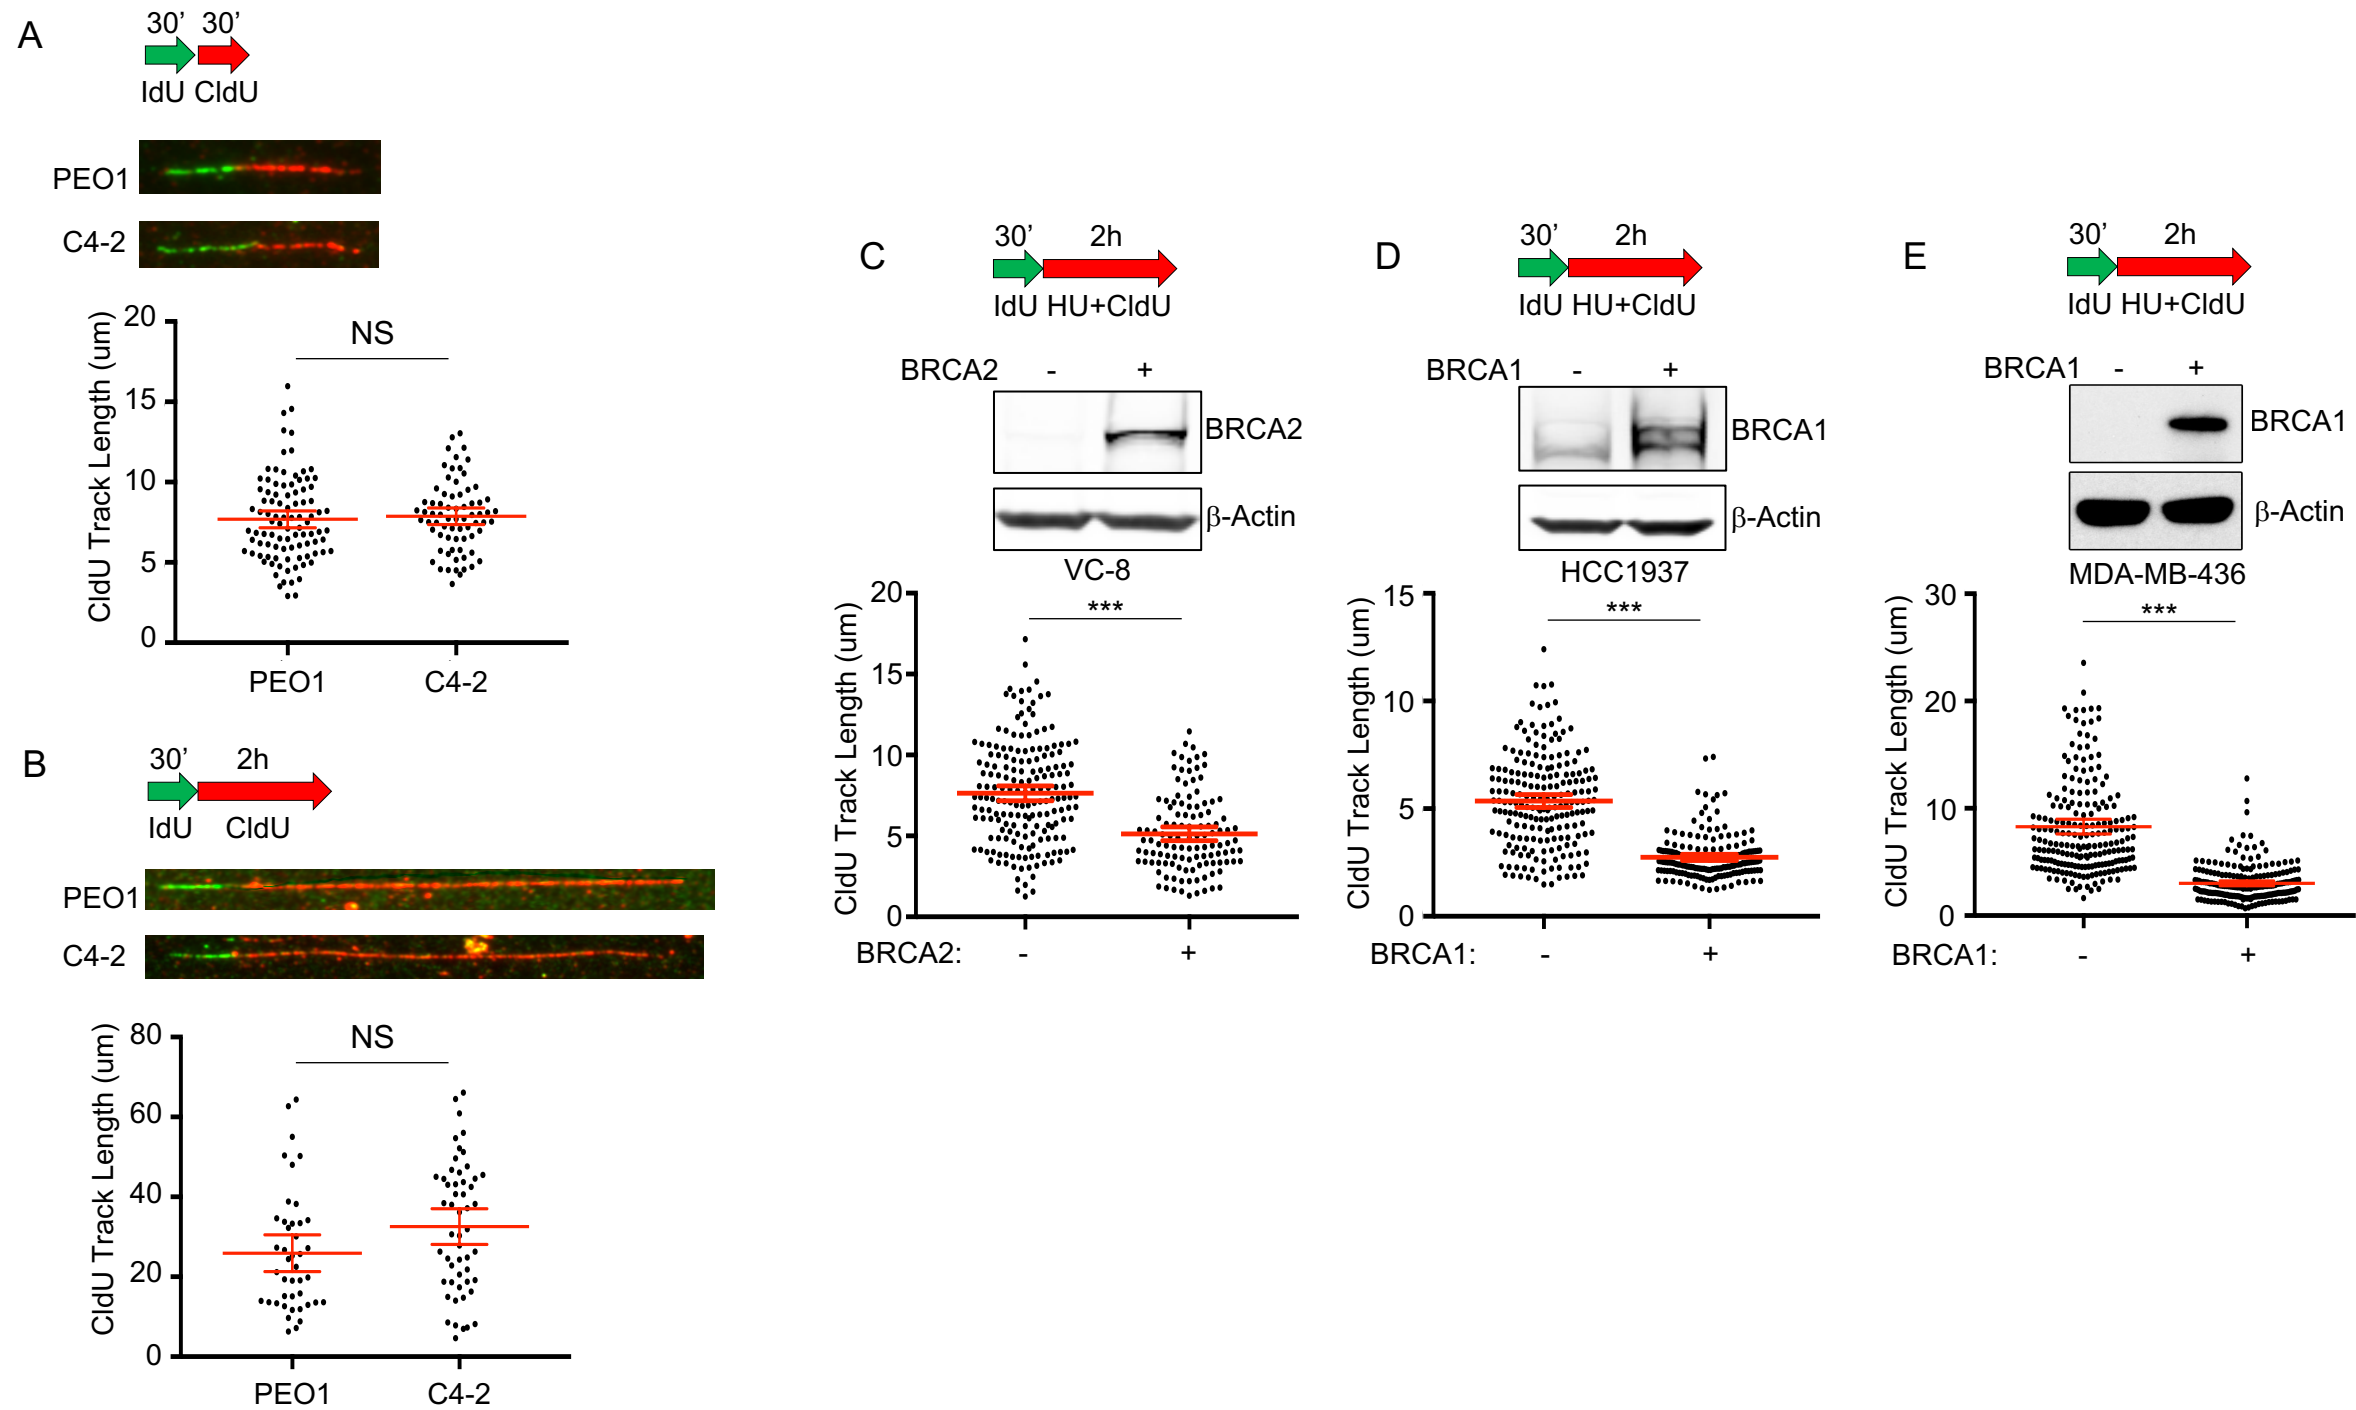

F

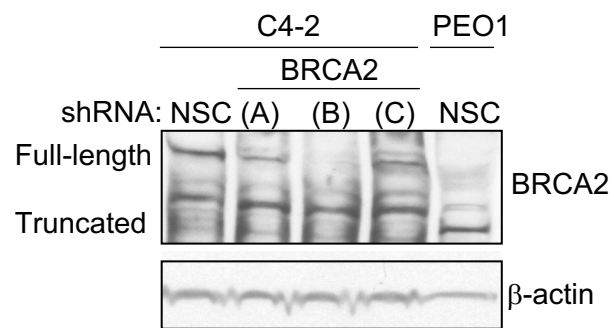

G

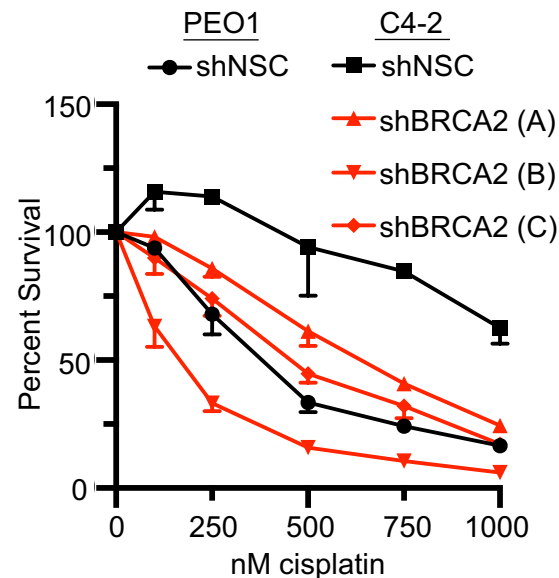

H

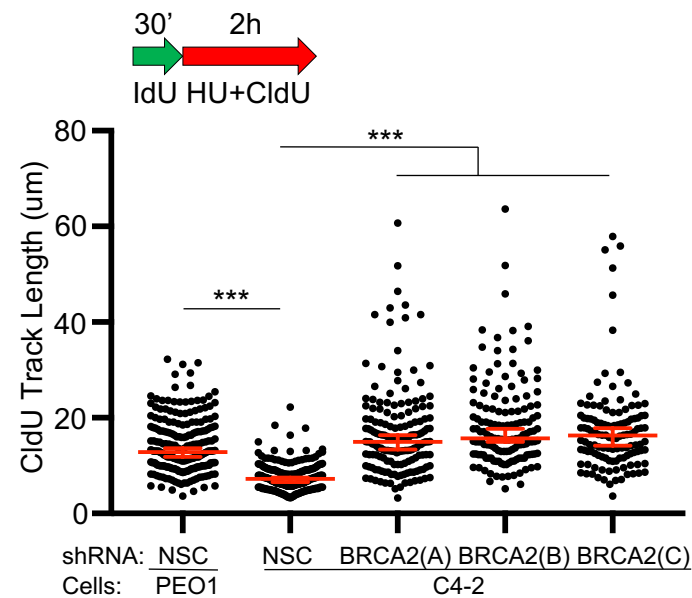

I

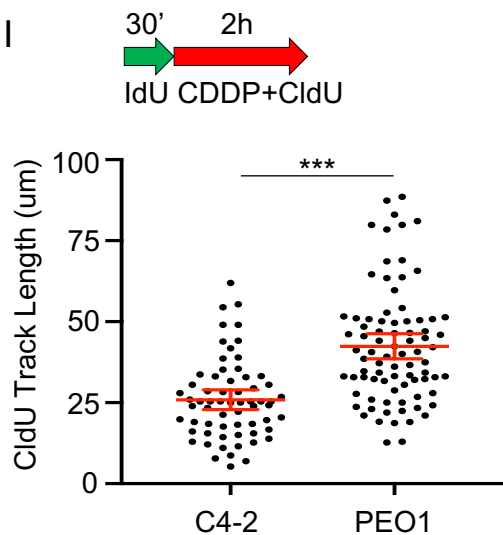

J

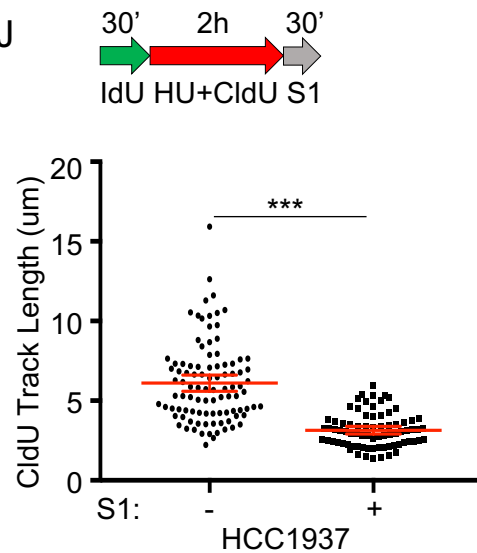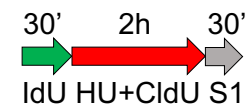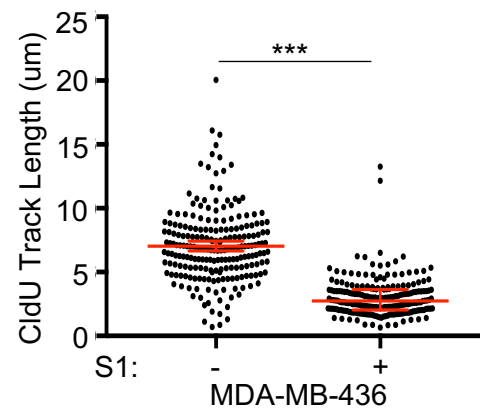

K

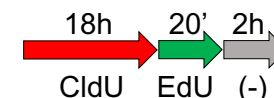

Non-Denaturing Conditions

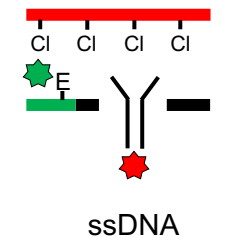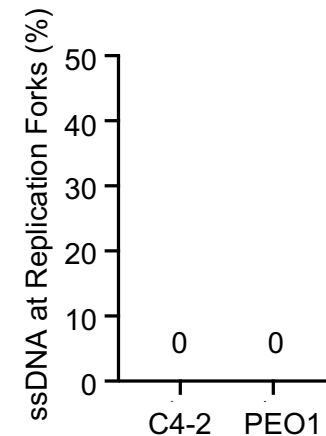

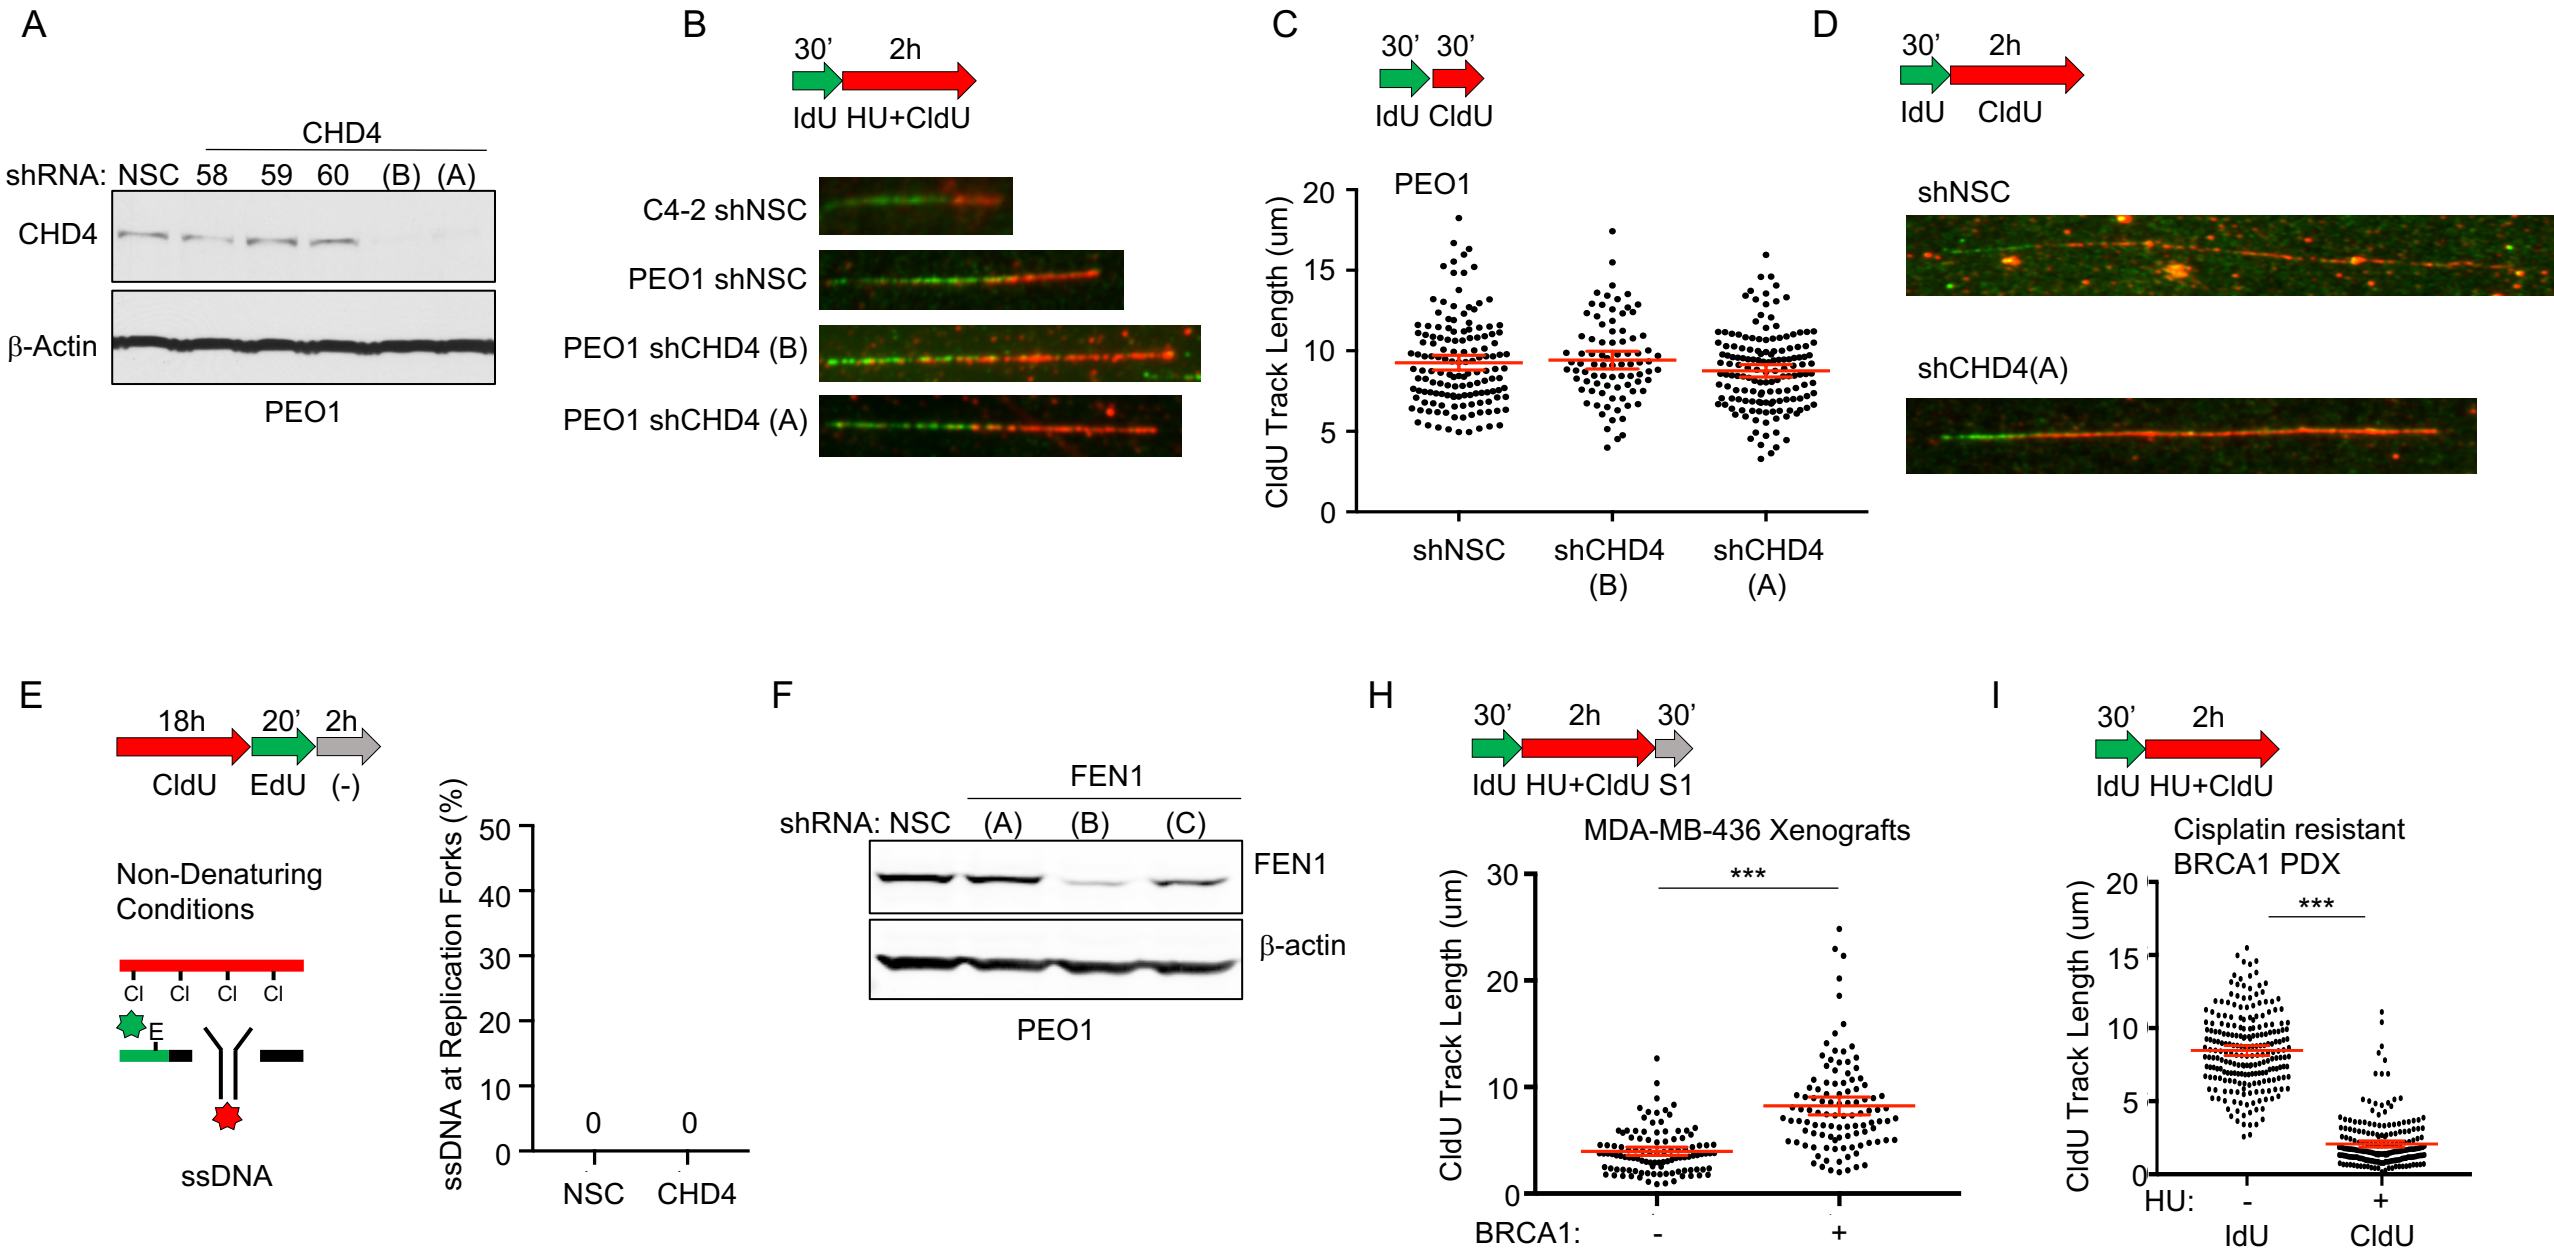

G

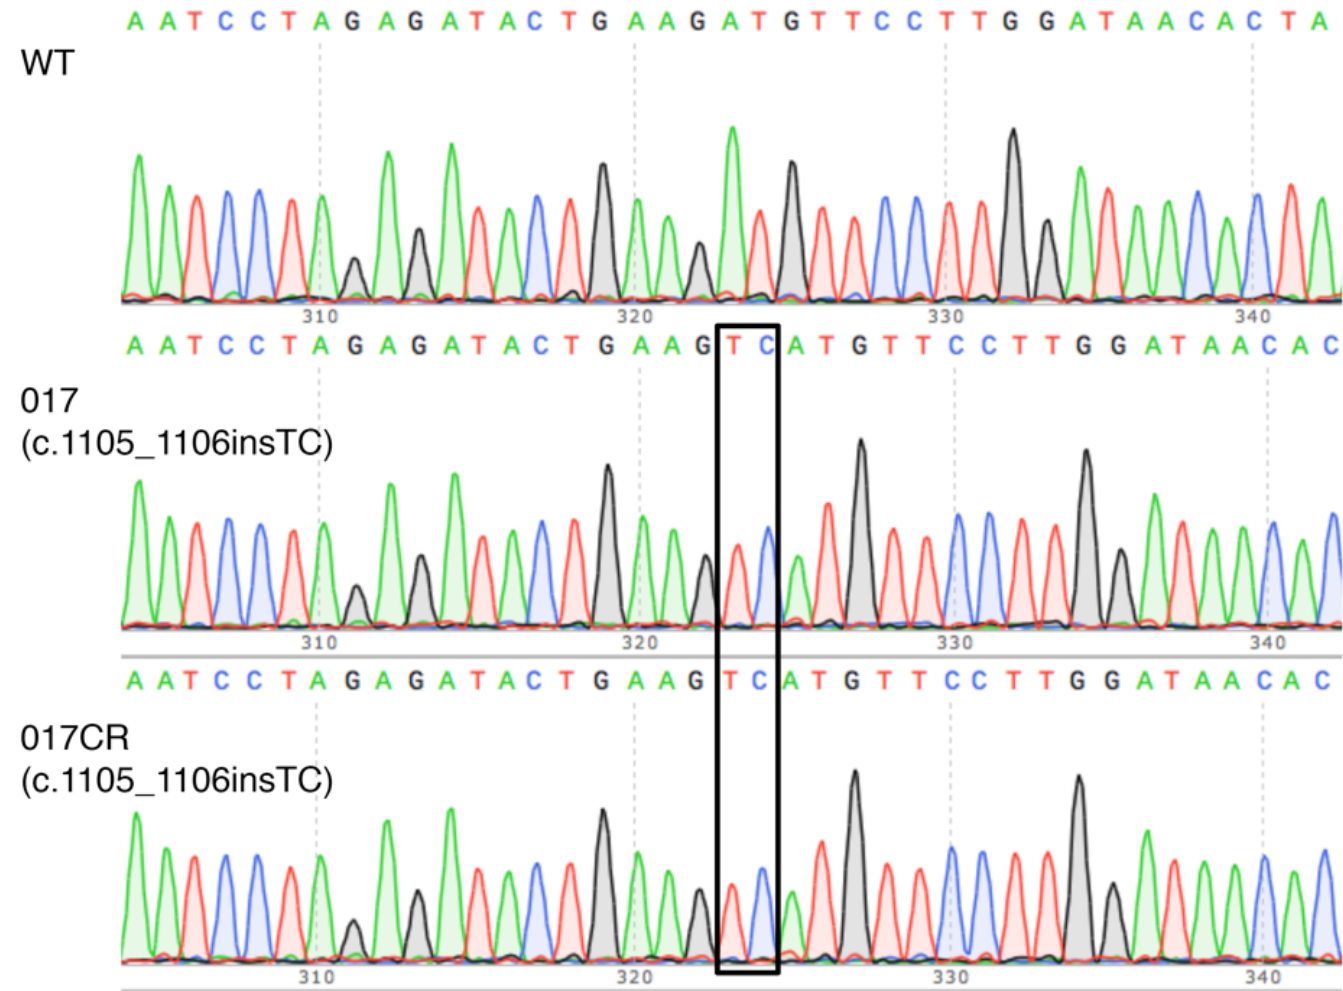

A

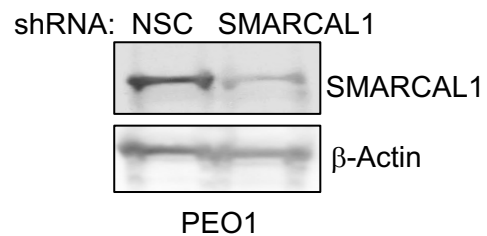

B

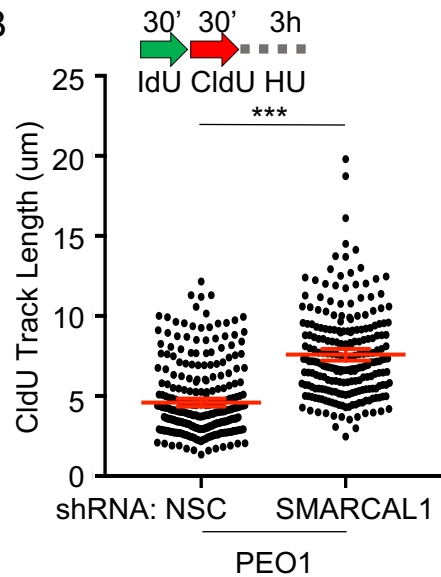

C

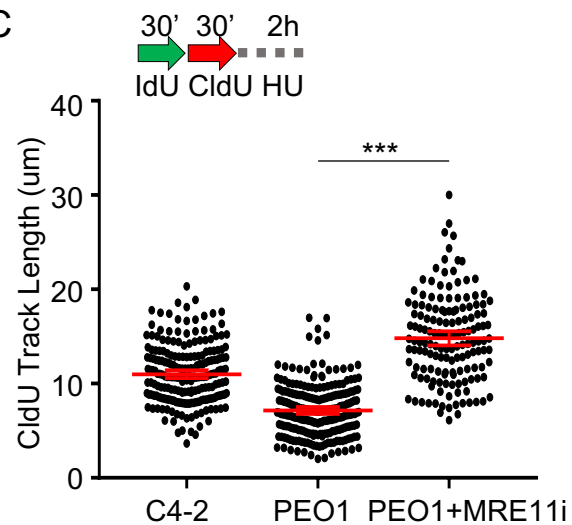

H

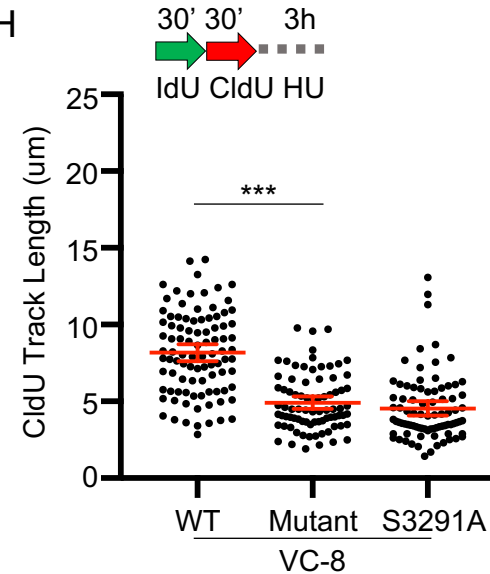

D

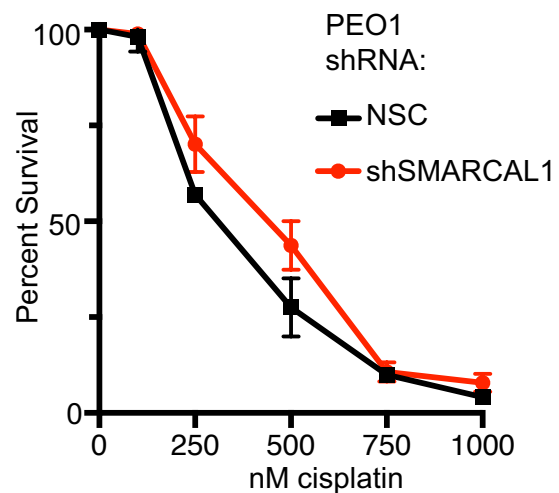

E

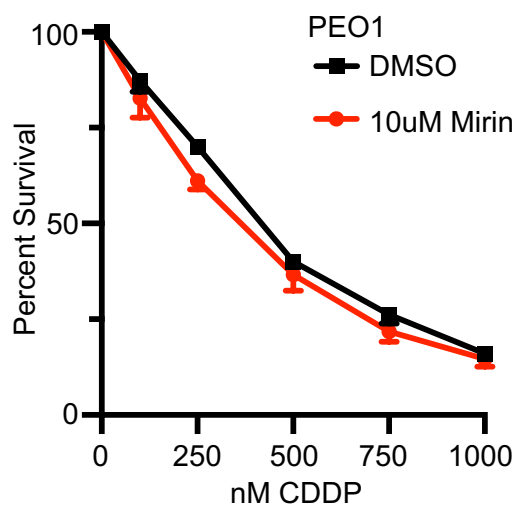

F

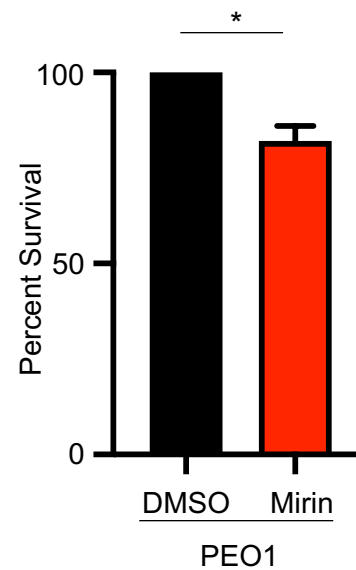

I

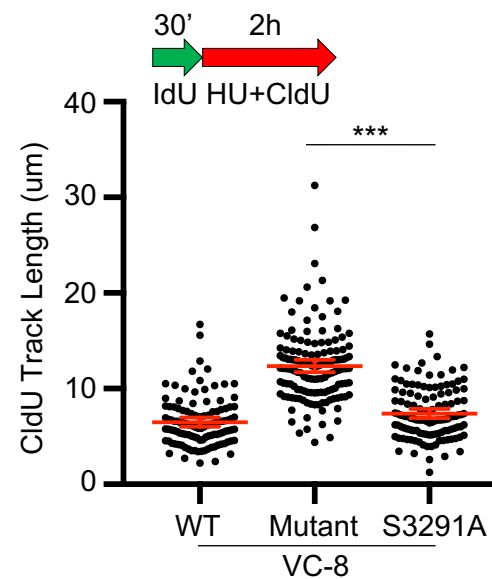

G

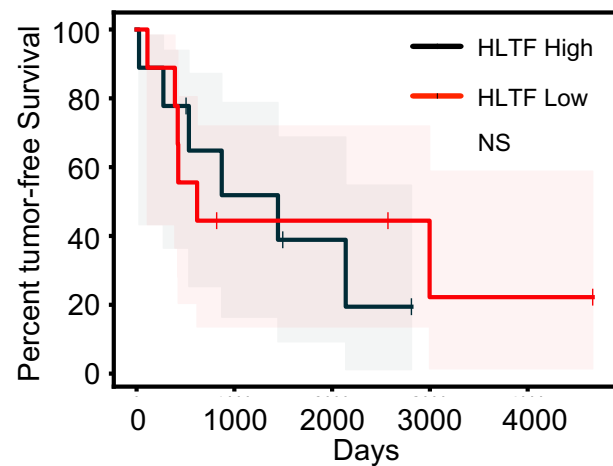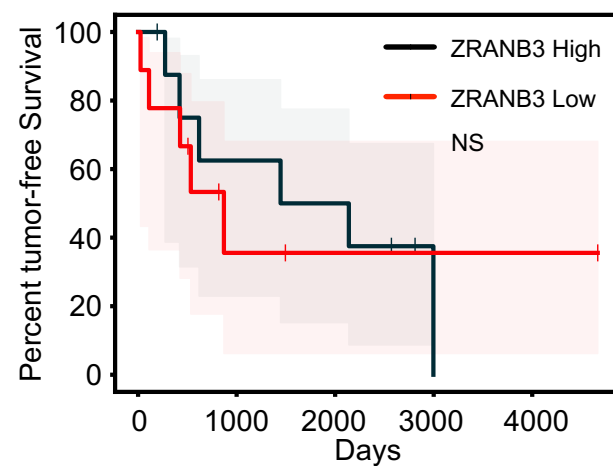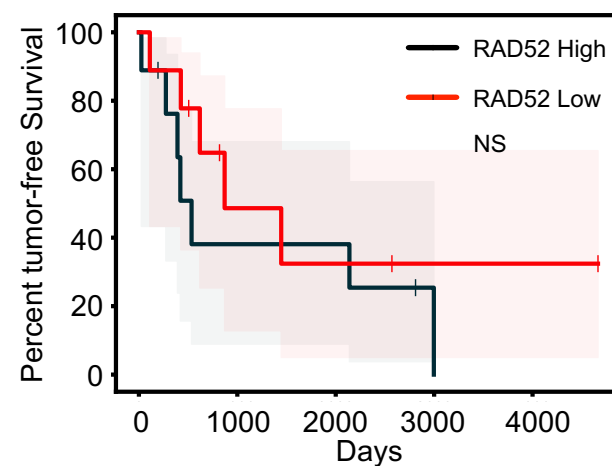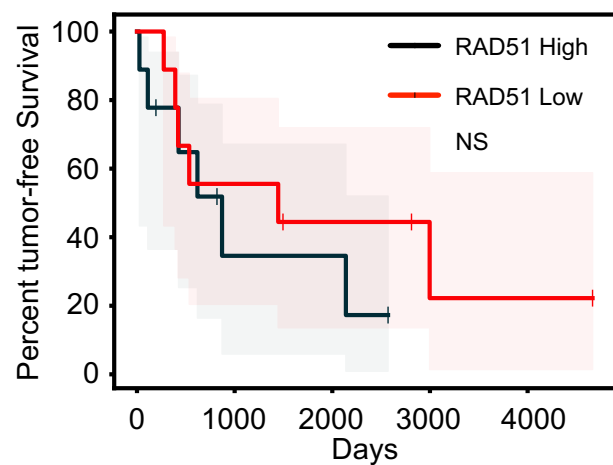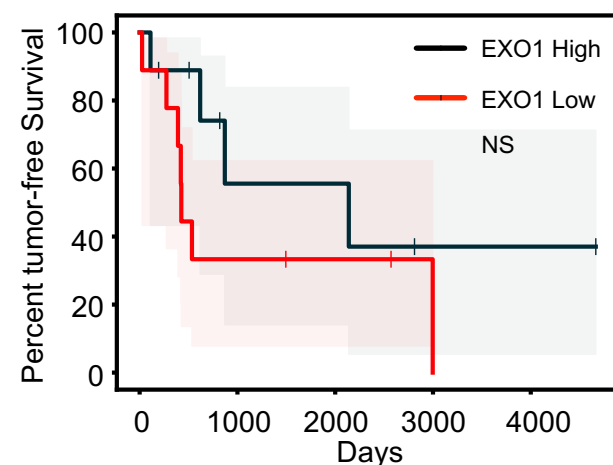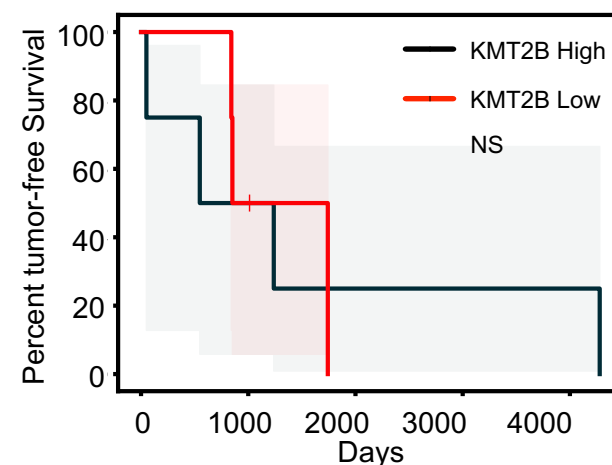

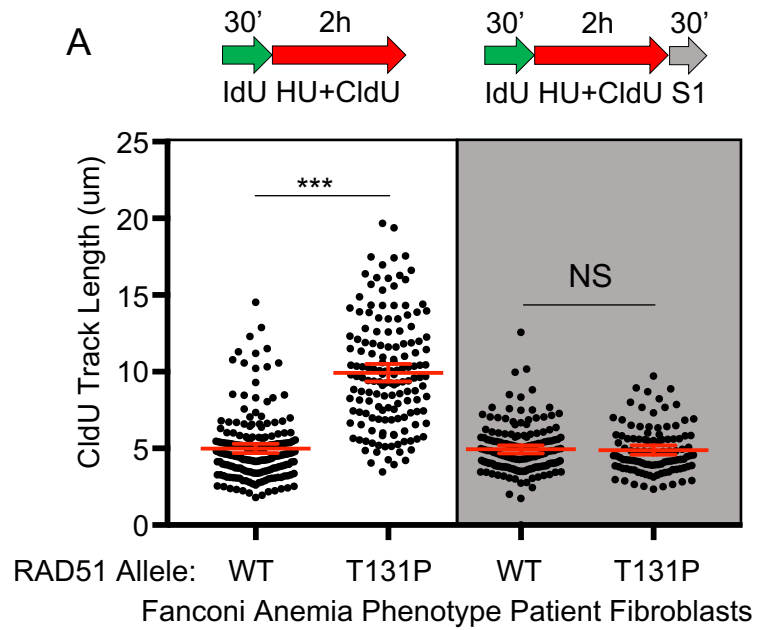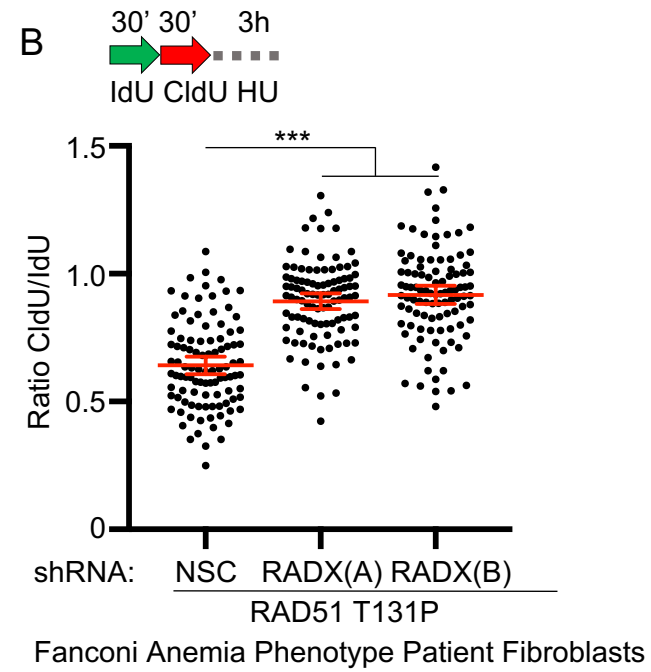

A

PEO1

500nM cisplatin: Untreated

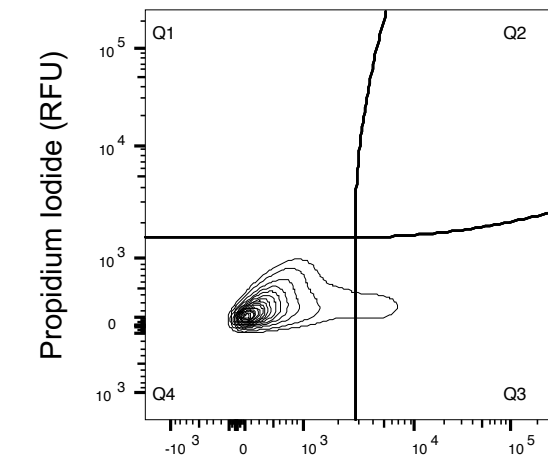

24h

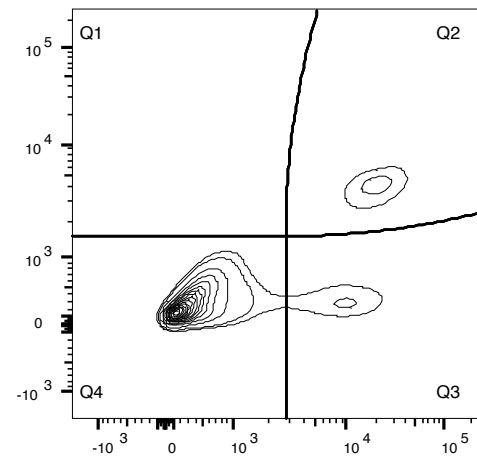

48h

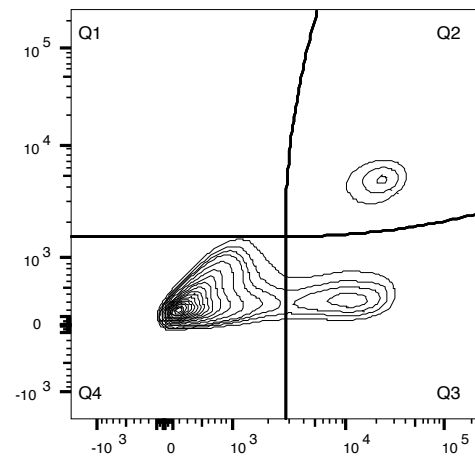

72h

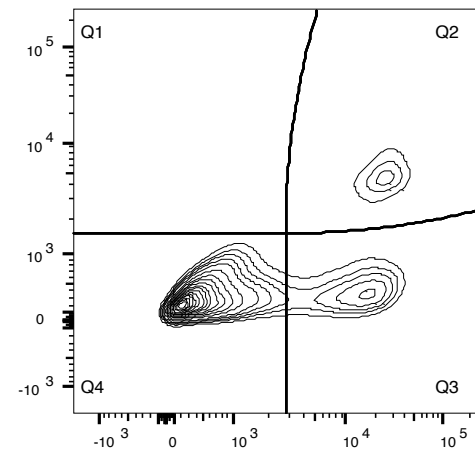

120h

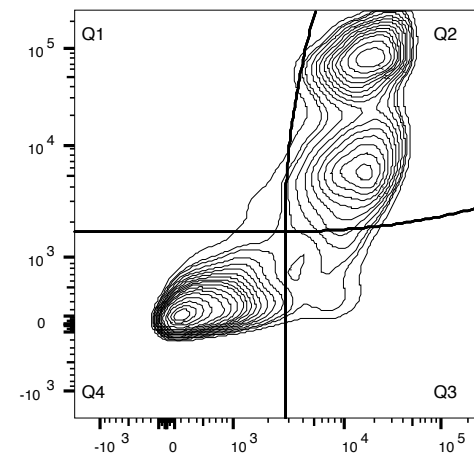

Annexin V (RFU)

B

C4-2

500nM cisplatin: Untreated

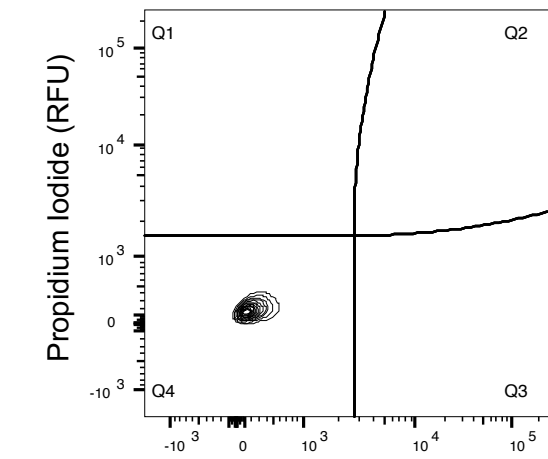

24h

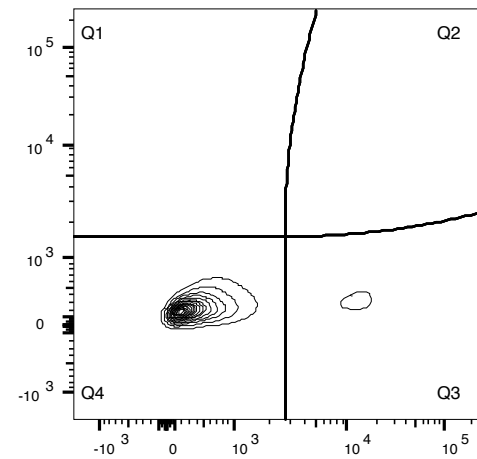

48h

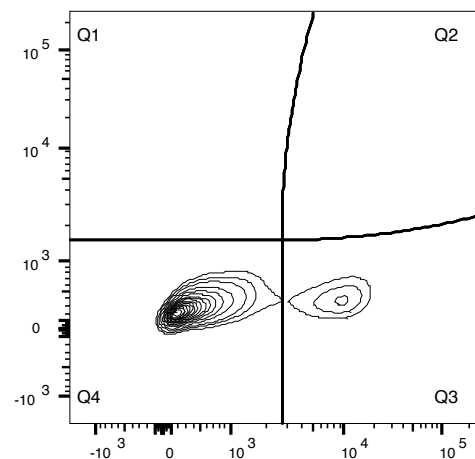

72h

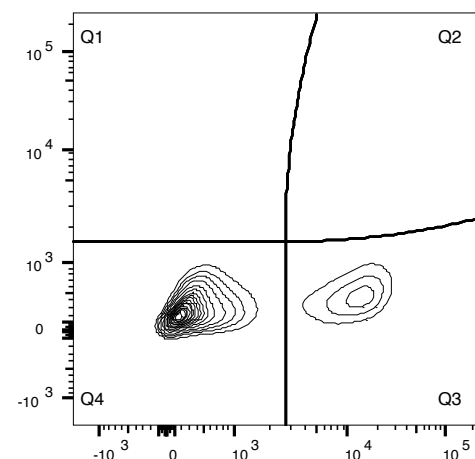

120h

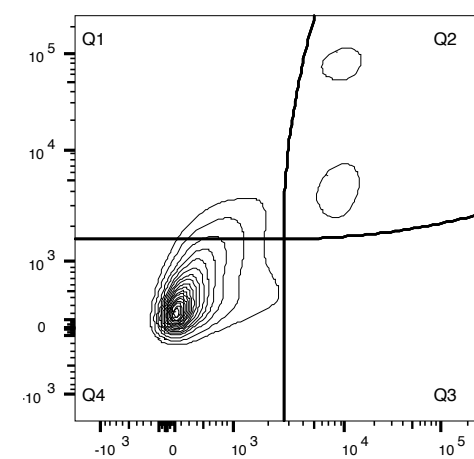

Annexin V (RFU)



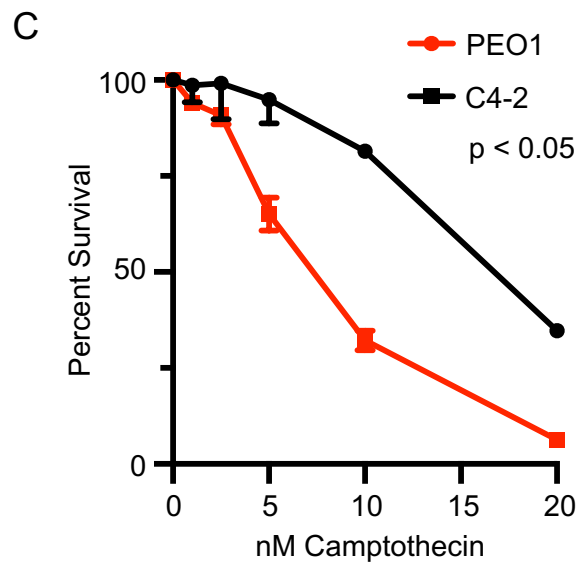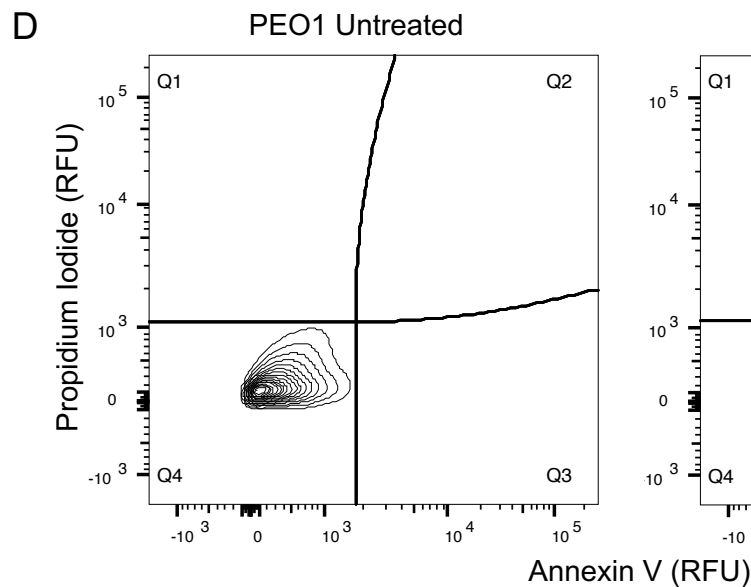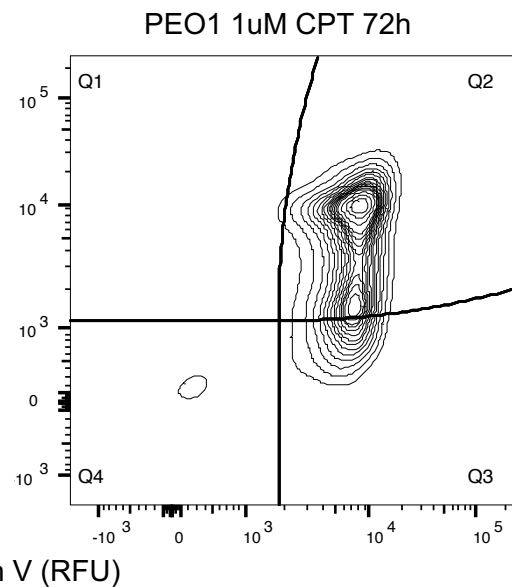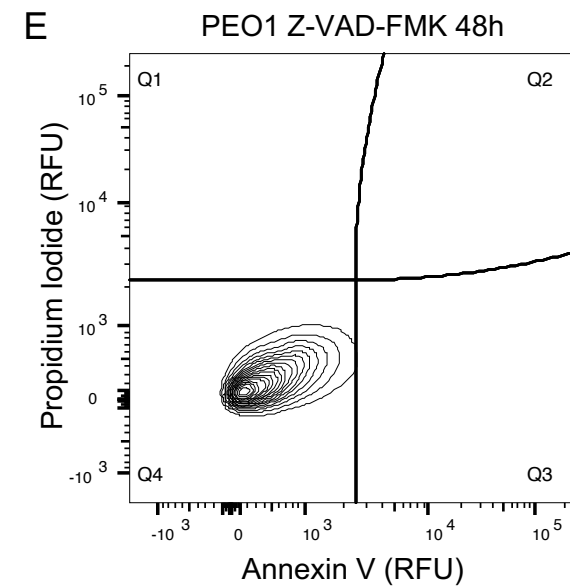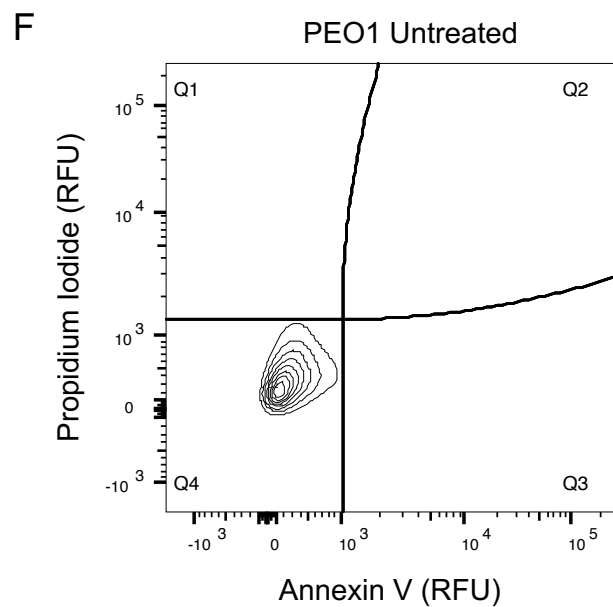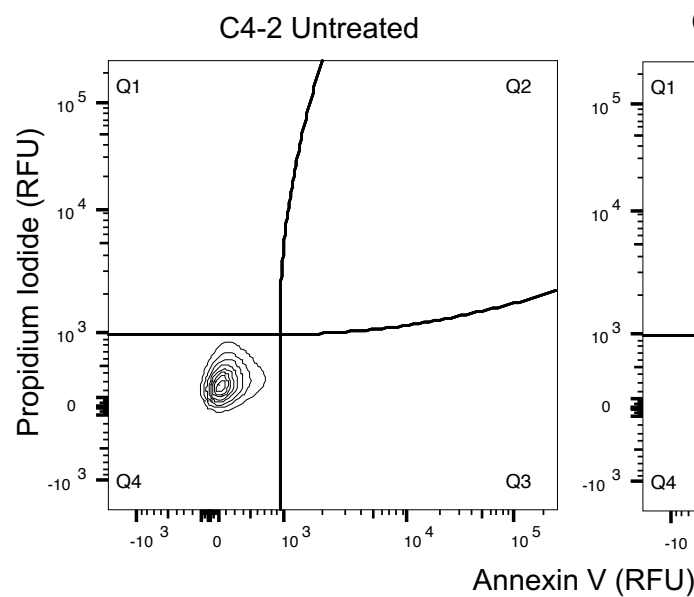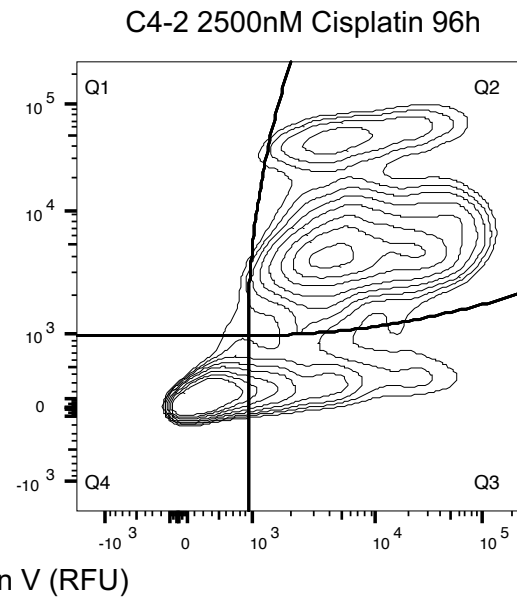

G

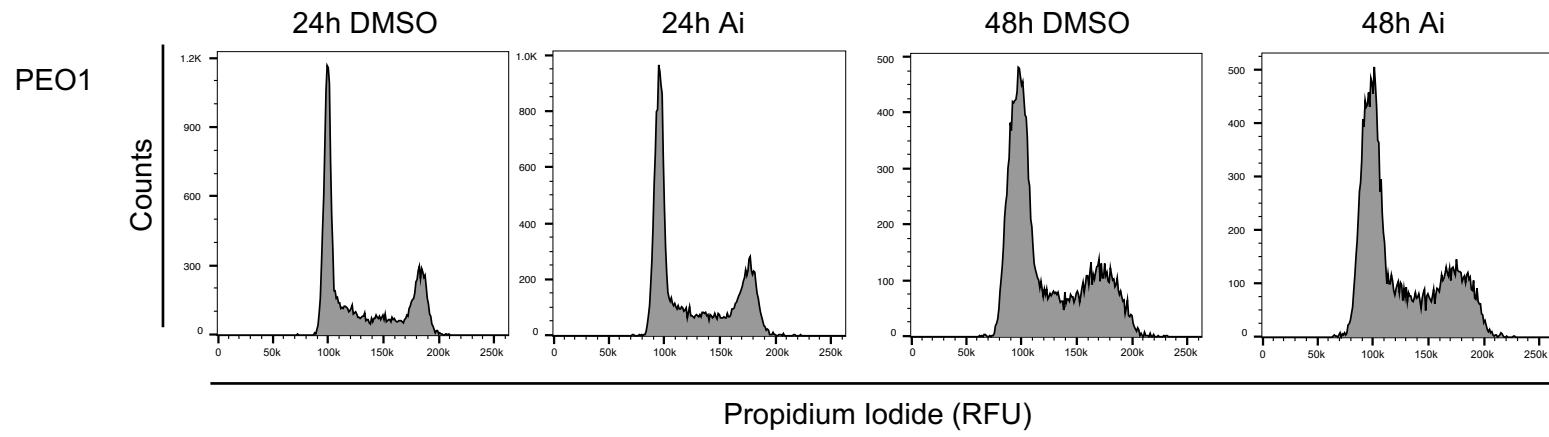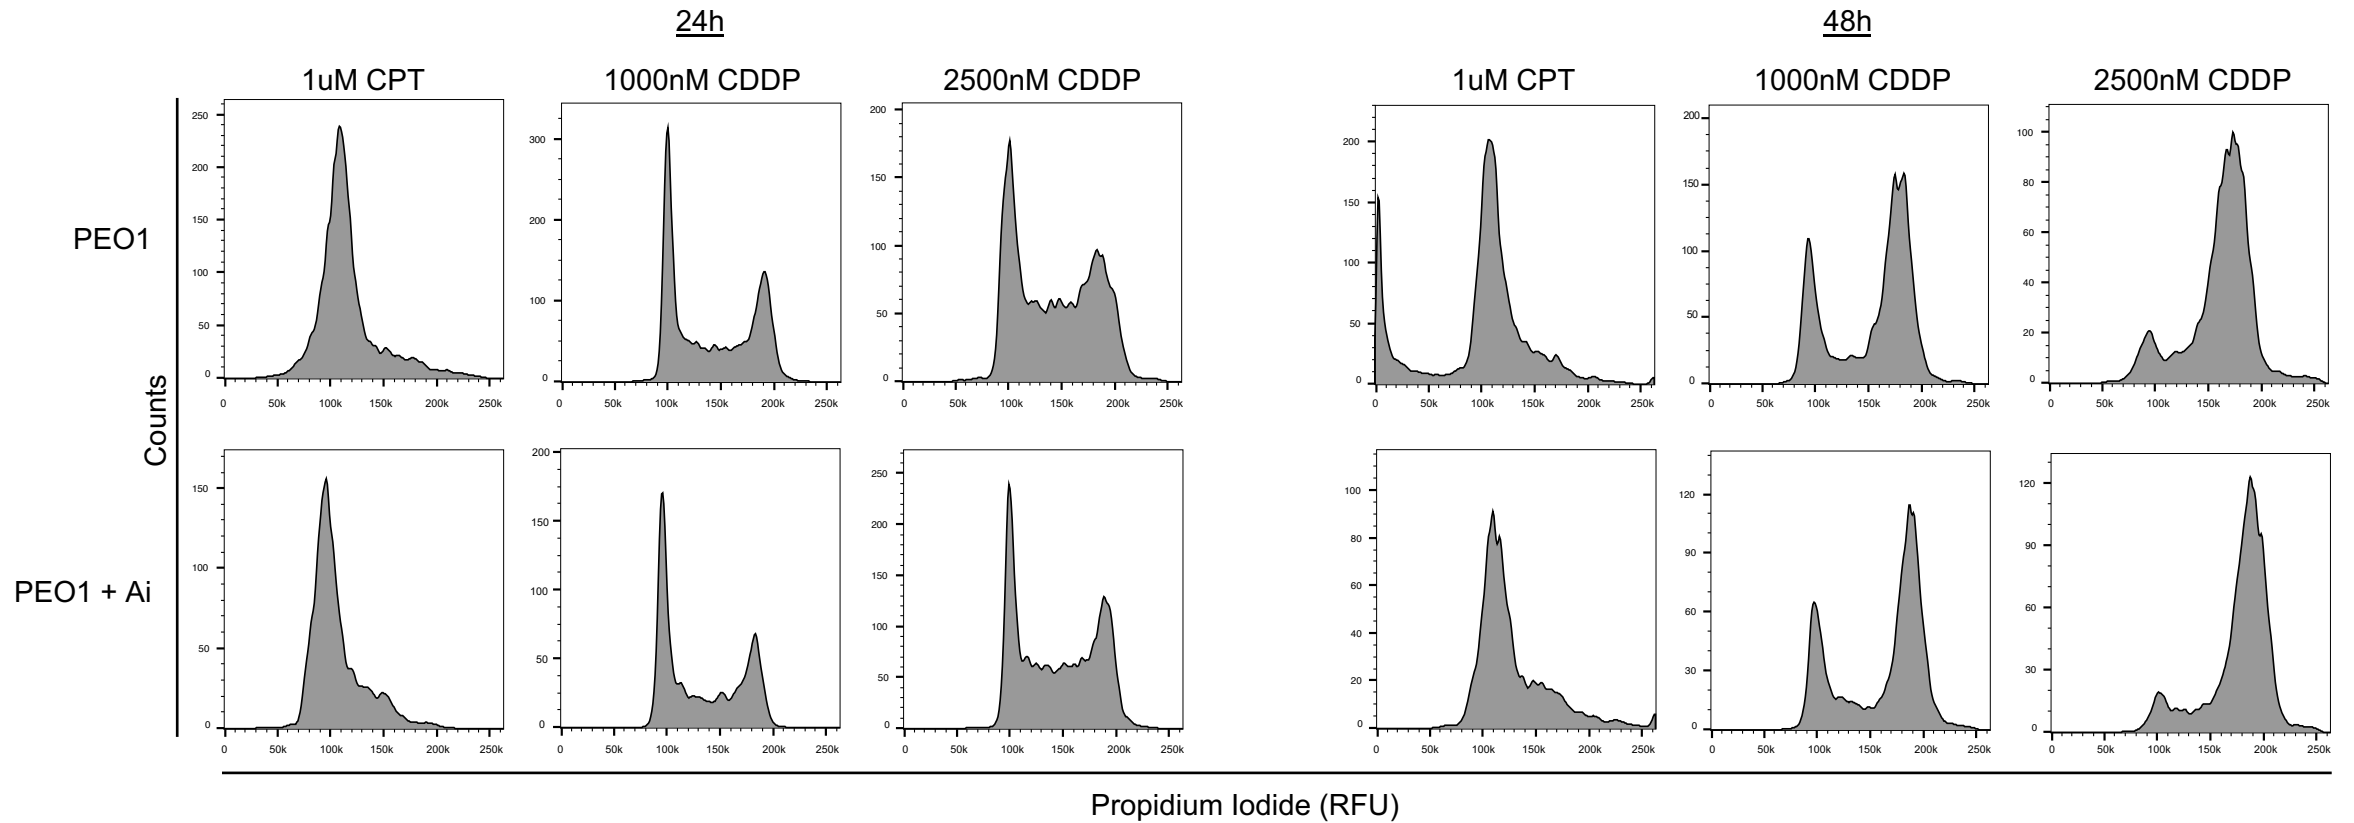

H

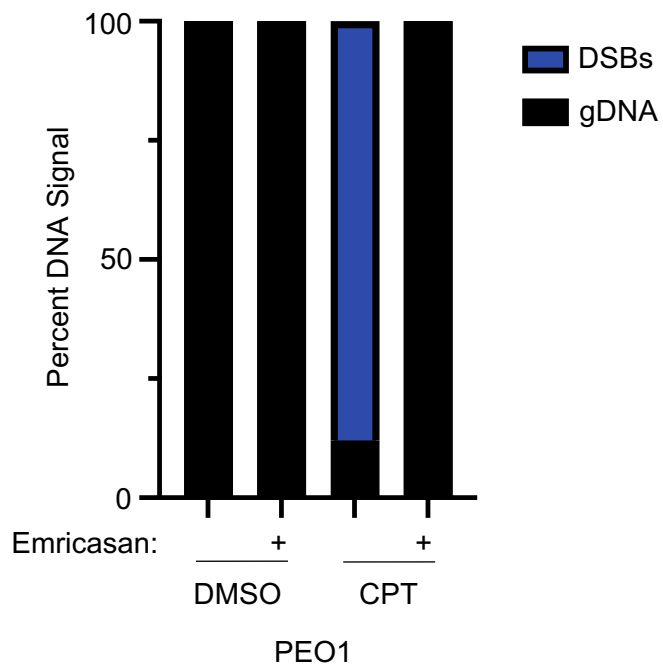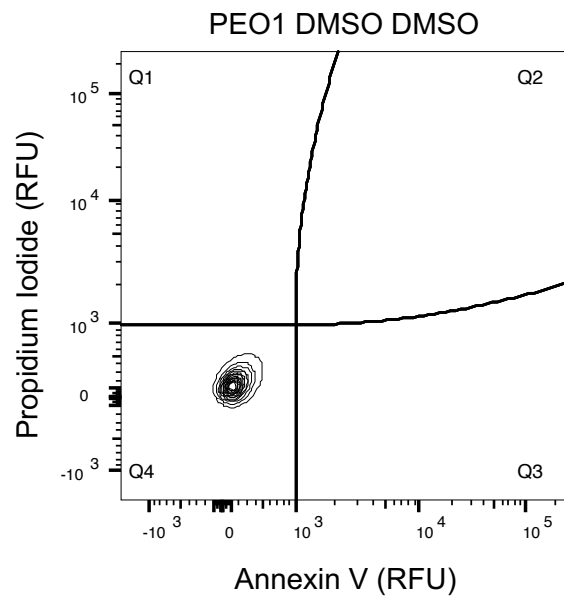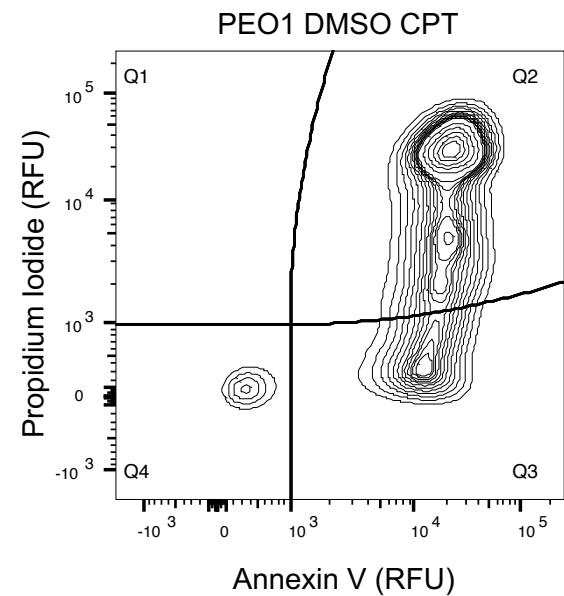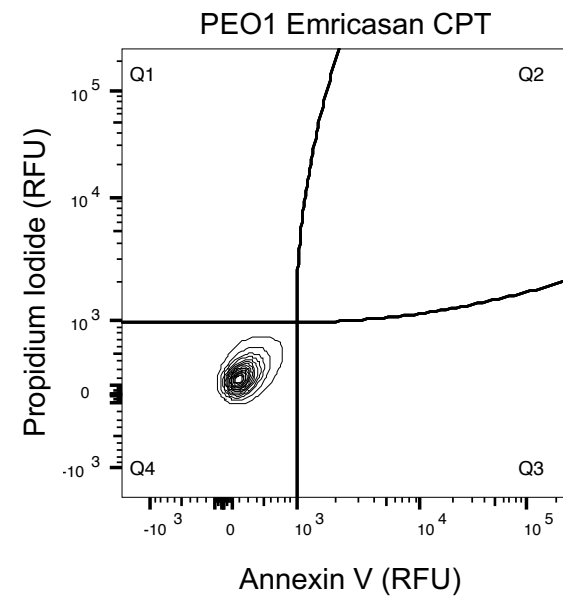

---

| Cell line                             | HR | FP | GS | Cisplatin Response |
|---------------------------------------|----|----|----|--------------------|
| BRCA1/2 proficient                    | +  | +  | +  | Resistant          |
| BRCA2 and CHD4 deficient              | -  | +  | +  | Resistant          |
| BRCA2 S3291A mutant                   | +  | -  | +  | Resistant          |
| BRCA1/2 deficient                     | -  | -  | -  | Hypersensitive     |
| RAD51 T131P mutant                    | +  | -  | -  | Hypersensitive     |
| RAD51 T131P mutant and RADX deficient | +  | +  | -  | Hypersensitive     |
| BRCA2 deficient and MRE11 inhibited   | -  | +  | -  | Hypersensitive     |
| BRCA2 and SMARCAL1 deficient          | -  | +  | -  | Hypersensitive     |

---
